# Supplementary material for: miRNA-337-3p inhibits gastric cancer progression through repressing myeloid zinc finger 1-facilitated expression of matrix metalloproteinase 14
Source: PubMed Central journal article supplement (PMC5130010; doi:10.18632/oncotarget.9739), 2016-05-31
Supplement: oncotarget-07-40314-s001.pdf [file oncotarget-07-40314-s001.pdf]

## miRNA-337-3p inhibits gastric cancer progression through repressing myeloid zinc finger 1-facilitated expression of matrix metalloproteinase 14

### Supplementary Materials

**Supplementary Table S1: MZF1 and MMP-14 expression in human gastric cancer tissues**

| Clinicopathologic factor     | Total        | MZF1 expression |                 | MMP-14 expression |                 |
|------------------------------|--------------|-----------------|-----------------|-------------------|-----------------|
|                              | <i>n</i> (%) | <i>n</i> (%)    | <i>P</i> -value | <i>n</i> (%)      | <i>P</i> -value |
| <b>Age (years)</b>           |              |                 |                 |                   |                 |
| ≤ 60                         | 26 (52.0)    | 16 (61.5)       | 0.817           | 18 (69.2)         | 0.902           |
| > 60                         | 24 (48.0)    | 14 (58.3)       |                 | 17 (70.8)         |                 |
| <b>Sex</b>                   |              |                 |                 |                   |                 |
| Male                         | 35 (70.0)    | 21 (60.0)       | 1.000           | 24 (68.6)         | 0.736           |
| Female                       | 15 (30.0)    | 9 (60.0)        |                 | 11 (73.3)         |                 |
| <b>Size (diameter)</b>       |              |                 |                 |                   |                 |
| ≤ 6 cm                       | 33 (66.0)    | 20 (60.1)       | 1.000           | 23 (69.7)         | 0.948           |
| > 6 cm                       | 17 (34.0)    | 10 (58.8)       |                 | 12 (70.6)         |                 |
| <b>Laurén classification</b> |              |                 |                 |                   |                 |
| Intestinal type              | 29 (58.0)    | 17 (58.6)       | 0.418           | 20 (68.9)         | 0.851           |
| Diffuse type                 | 21 (42.0)    | 13 (61.9)       |                 | 15 (71.4)         |                 |
| <b>Gastric wall invasion</b> |              |                 |                 |                   |                 |
| T1/T2                        | 18 (36.0)    | 2 (11.1)        | < 0.001         | 6 (33.3)          | < 0.001         |
| T3/T4                        | 32 (64.0)    | 28 (87.5)       |                 | 29 (90.6)         |                 |
| <b>Lymph node metastasis</b> |              |                 |                 |                   |                 |
| Negative                     | 18 (36.0)    | 4 (22.2)        | < 0.001         | 5 (27.8)          | < 0.001         |
| Positive                     | 32 (64.0)    | 26 (81.3)       |                 | 30 (93.8)         |                 |
| <b>Distant metastasis</b>    |              |                 |                 |                   |                 |
| Negative                     | 38 (76.0)    | 19 (50.0)       | 0.029           | 23 (60.5)         | 0.009           |
| Positive                     | 12 (24.0)    | 11 (91.7)       |                 | 12 (100.0)        |                 |
| <b>TNM stage</b>             |              |                 |                 |                   |                 |
| I/II                         | 17 (34.0)    | 3 (17.6)        | < 0.001         | 5 (29.4)          | < 0.001         |
| III/IV                       | 33 (66.0)    | 27 (81.8)       |                 | 30 (90.9)         |                 |

MZF1, myeloid zinc finger 1; MMP-14, matrix metalloproteinases 14; TNM, tumor-node-metastasis.

**Supplementary Table S2: Correlation between the expression of MZF1 and MMP-14**

|                          | MZF1 expression |      | <i>R</i> -value | <i>P</i> -value |
|--------------------------|-----------------|------|-----------------|-----------------|
|                          | Low             | High |                 |                 |
| <b>MMP-14 expression</b> |                 |      |                 |                 |
| Low                      | 18              | 2    | 0.500           | < 0.001         |
| High                     | 12              | 18   |                 |                 |

MZF1, myeloid zinc finger 1; MMP-14, matrix metalloproteinases 14; Pearson's correlation coefficient was applied to determine the expression correlation.

**Supplementary Table S3: Comparison of survival curves of gastric cancer patients**

| Comparison                          | Chi-square | Bonferroni <i>P</i> -value |
|-------------------------------------|------------|----------------------------|
| MZF1-low v.s. MZF1-high             | 56.33      | < $1.0 \times 10^{-10}$    |
| MZF1-low v.s. MMP-14-low            | 1.49       | 1                          |
| MZF1-low v.s. MMP-14-high           | 30.61      | $1.6 \times 10^{-7}$       |
| MZF1-low v.s. miR-337-3p-low        | 46.26      | < $1.0 \times 10^{-10}$    |
| MZF1-low v.s. miR-337-3p-high       | 0.02       | 1                          |
| MZF1-high v.s. MMP-14-low           | 44.17      | < $1.0 \times 10^{-10}$    |
| MZF1-high v.s. MMP-14-high          | 5.36       | 0.1029                     |
| MZF1-high v.s. miR-337-3p-low       | 0.38       | 1                          |
| MZF1-high v.s. miR-337-3p-high      | 55.72      | < $1.0 \times 10^{-10}$    |
| MMP-14-low v.s. MMP-14-high         | 30.41      | $1.8 \times 10^{-7}$       |
| MMP-14-low v.s. miR-337-3p-low      | 37.09      | < $1.0 \times 10^{-10}$    |
| MMP-14-low v.s. miR-337-3p-high     | 1.27       | 1                          |
| MMP-14-high v.s. miR-337-3p-low     | 2.71       | 0.4992                     |
| MMP-14-high v.s. miR-337-3p-high    | 31.24      | $1.1 \times 10^{-7}$       |
| miR-337-3p-low v.s. miR-337-3p-high | 46.35      | < $1.0 \times 10^{-10}$    |

MZF1, myeloid zinc finger 1; MMP-14, matrix metalloproteinases 14; Bonferroni method was applied for the comparison of survival curves.

**Supplementary Table S4: Univariate and multivariate analysis of prognostic factors in gastric cancer patients**

| Variables                    | <i>n</i> | Univariate analysis |                 | Multivariate analysis |             |                 |
|------------------------------|----------|---------------------|-----------------|-----------------------|-------------|-----------------|
|                              |          | Mean ± SEM (months) | <i>P</i> -value | Hazard ratio          | 95% CI      | <i>P</i> -value |
| <b>Age (years)</b>           |          |                     |                 |                       |             |                 |
| ≤ 60                         | 26       | 35.4 ± 4.9          | 0.902           | 1.017                 | 0.482–3.143 | 0.765           |
| > 60                         | 24       | 36.7 ± 5.1          |                 |                       |             |                 |
| <b>Sex</b>                   |          |                     |                 |                       |             |                 |
| Male                         | 35       | 37.0 ± 4.2          | 0.872           | 1.397                 | 0.427–3.465 | 0.675           |
| Female                       | 15       | 33.3 ± 6.6          |                 |                       |             |                 |
| <b>Size (diameter)</b>       |          |                     |                 |                       |             |                 |
| ≤ 6 cm                       | 33       | 37.2 ± 4.2          | 0.896           | 1.807                 | 1.311–5.162 | 0.467           |
| > 6 cm                       | 17       | 33.9 ± 6.4          |                 |                       |             |                 |
| <b>Laurén classification</b> |          |                     |                 |                       |             |                 |
| Intestinal type              | 29       | 41.2 ± 4.3          | 0.146           | 1.596                 | 0.352–4.233 | 0.545           |
| Diffuse type                 | 21       | 28.9 ± 5.7          |                 |                       |             |                 |
| <b>Gastric wall invasion</b> |          |                     |                 |                       |             |                 |
| T1/T2                        | 18       | 64.7 ± 0.2          | < 0.001         | 2.218                 | 1.682–6.924 | 0.332           |
| T3/T4                        | 32       | 18.9 ± 2.5          |                 |                       |             |                 |
| <b>Lymph node metastasis</b> |          |                     |                 |                       |             |                 |
| Negative                     | 18       | 61.5 ± 0.3          | < 0.001         | 2.018                 | 1.339–5.756 | 0.431           |
| Positive                     | 32       | 20.7 ± 2.5          |                 |                       |             |                 |
| <b>Distant metastasis</b>    |          |                     |                 |                       |             |                 |
| Negative                     | 38       | 44.8 ± 3.6          | < 0.001         | 2.052                 | 1.976–5.513 | 0.002           |
| Positive                     | 12       | 8.1 ± 0.5           |                 |                       |             |                 |
| <b>TNM stage</b>             |          |                     |                 |                       |             |                 |
| I/II                         | 17       | 64.7 ± 0.2          | < 0.001         | 2.722                 | 1.976–6.713 | 0.005           |
| III/IV                       | 33       | 20.5 ± 2.8          |                 |                       |             |                 |
| <b>MZF1 expression</b>       |          |                     |                 |                       |             |                 |
| Low                          | 30       | 52.3 ± 3.4          | < 0.001         | 3.516                 | 1.537–8.942 | 0.018           |
| High                         | 20       | 11.6 ± 1.3          |                 |                       |             |                 |
| <b>miR-337-3p expression</b> |          |                     |                 |                       |             |                 |
| Low                          | 22       | 59.3 ± 2.8          | < 0.001         | 0.393                 | 0.128–0.705 | 0.015           |
| High                         | 28       | 20.0 ± 3.1          |                 |                       |             |                 |
| <b>MMP-14 expression</b>     |          |                     |                 |                       |             |                 |
| Low                          | 20       | 13.6 ± 2.4          | < 0.001         | 2.319                 | 1.275–6.334 | 0.028           |
| High                         | 30       | 53.5 ± 3.3          |                 |                       |             |                 |

MZF1, myeloid zinc finger 1; MMP-14, matrix metalloproteinases 14; TNM, tumor-node-metastasis; Log-rank test and Cox regression model were applied for univariate and multivariate analysis. *n*, number of patients; SEM, standard error of the mean; 95% CI, 95% confidence interval.

**Supplementary Table S5: Oligonucleotide sets used for constructs, inhibitors and short hairpin RNAs**

| Oligo Set                       | Sequences                                                                                                                                                                           |
|---------------------------------|-------------------------------------------------------------------------------------------------------------------------------------------------------------------------------------|
| Pre-miR-337-3p                  | 5'-TGCTGCTCCTATATGATGCCTTTCTTCGTTTTGGCCACTGACTGACGAAGAAAGGCATC<br>ATATAGGAG-3'(sense);<br>5'-CCTGCTCCTATATGATGCCTTTCTTCGTCAGTCAGTGGCCAAAACGAAGAAAGGCATCA<br>TATAGGAGC-3'(antisense) |
| Pre-miR-NC                      | 5'-TGCTGAAATGTACTGCGCGTGGAGACGTTTTGGCCACTGACTGACGTCTCCACGCAG<br>TACATTT-3'(sense);<br>5'-CCTGAAATGTACTGCGTGGAGACGTCAGTCAGTGGCCAAAACGTCTCCACGCGCAGT<br>ACATTT-3'(antisense)          |
| pGL3-MMP14 mut<br>(ΔMZF1)       | 5'-CTGGGGCTTTCACGGAGGAGAGGCTGTGGGAGAAGG-3'(sense);<br>5'-CTCCTCCGTGAAAGCCCCAGTGCCCTCCTTTCCTGGT-3'(antisense)                                                                        |
| pGL3-MMP14 mut<br>(ΔmiR-337-3p) | 5'-CTGGGGCGGGGACGGAGGAGCAATTGTGTTCAAAGGGAGGGA-3'(sense);<br>5'-CTCCTCCGTCCCCGCCCCAGTGCCCTCCTT-3'(antisense)                                                                         |
| Anti-NC                         | RiboBio                                                                                                                                                                             |
| Anti-miR-337-3p                 | RiboBio                                                                                                                                                                             |
| sh-Scb                          | 5'-CCGGGCGAACGATCGAGTAAACGGACTCGAGTCCGTTTACTCGATCGTTTCGCTTTTT-3'<br>(sense);<br>5'-AATTCAAAAAGCGAACGATCGAGTAAACGGACTCGAGTCCGTTTACTCGATCGTTTCGC-3'<br>(antisense)                    |
| sh-MZF1-1                       | 5'-CCGGCCACCAGAGCACCAAGCTCATCTCGAGATGAGCTTGGTGCTCTGGTGGTTTTTG-3'<br>(sense);<br>5'-AATTCAAAAACCACCAGAGCACCAAGCTCATCTCGAGATGAGCTTGGTGCTCTGGTGG-3'<br>(antisense)                     |
| sh-MZF1-2                       | 5'-CCGGCCGTTGCGATGTATGTGGCAACTCGAGTTGCCACATACATCGCAACGGTTTTTG-3'<br>(sense);<br>5'-AATTCAAAAACCGTTGCGATGTATGTGGCAACTCGAGTTGCCACATACATCGCAACGG-3'<br>(antisense)                     |
| sh-AGO2-1                       | 5'-CCGGGCACAGCCAGTAATCGAGTTTCTCGAGAAACTCGATTACTGGCTGTGCTTTTTG-3'<br>(sense);<br>5'-AATTCAAAAAGCACAGCCAGTAATCGAGTTTCTCGAGAAACTCGATTACTGGCTGTGC-3'<br>(antisense)                     |
| sh-AGO2-2                       | 5'-CCGGCGTCCGTGAATTTGGAATCATCTCGAGATGATTCCAAATTCACGGACGTTTTTG-3'<br>(sense);<br>5'-AATTCAAAAACGTCCGTGAATTTGGAATCATCTCGAGATGATTCCAAATTCACGGACG-3'<br>(antisense)                     |

Pre-miR-NC, negative control pre-miRNA; MMP-14, matrix metalloproteinases 14; MZF1, myeloid zinc finger 1; Anti-NC, negative control inhibitor; sh-Scb, scramble short hairpin RNA; AGO2, argonaute 2.

**Supplementary Table S6: Primer sets used for qRT-PCR, nuclear run-on, and ChIP**

| Primer set                  | Primers | Sequence                      | Product size (bp) | Application    |
|-----------------------------|---------|-------------------------------|-------------------|----------------|
| MMP-14                      | Forward | 5'-GCCTTCTGTTCCCTGATAA-3'     | 225               | qRT-PCR        |
|                             | Reverse | 5'-CCATCCTTCCTCTCGTAG-3'      |                   | nuclear run-on |
| VEGF                        | Forward | 5'-ATGACGAGGGCCTGGAGTGT-3'    | 226               | qRT-PCR        |
|                             | Reverse | 5'-CATTTACACGTCTGCGGATCT-3'   |                   |                |
| MZF1                        | Forward | 5'-CTGAAACTGAGCCTCCAACCTCC-3' | 232               | qRT-PCR        |
|                             | Reverse | 5'-CCAGTCTTGCTGTGGGGAAA-3'    |                   |                |
| β-actin                     | Forward | 5'-ATCTACGAGGGGTATGCC-3'      | 227               | qRT-PCR        |
|                             | Reverse | 5'-TAGCTCTTCTCCAGGGAG-3'      |                   |                |
| miR-337-3p                  | Forward | RiboBio                       |                   | qRT-PCR        |
|                             | Reverse | RiboBio                       |                   |                |
| U6                          | Forward | RiboBio                       |                   | qRT-PCR        |
|                             | Reverse | RiboBio                       |                   |                |
| MMP-14 set 1<br>(-326/-157) | Forward | 5'-TCAAGCCACTCAGAATATGC-3'    | 170               | ChIP           |
|                             | Reverse | 5'-ACCAAGAACTGGAAGGAAAA-3'    |                   |                |
| MMP-14 set 2<br>(-122/+69)  | Forward | 5'-CAACCAGGAAAGGAGGGC-3'      | 191               | ChIP           |
|                             | Reverse | 5'-TCGGCTTGAGTTAAAGG-3'       |                   |                |

MMP-14, matrix metalloproteinase 14; VEGF, vascular endothelial growth factor; MZF1, myeloid zinc finger 1.

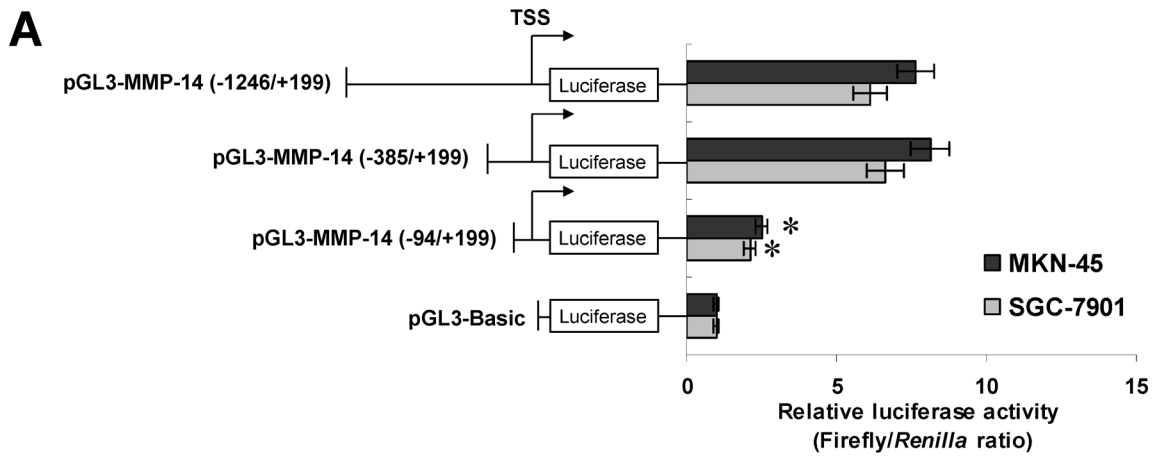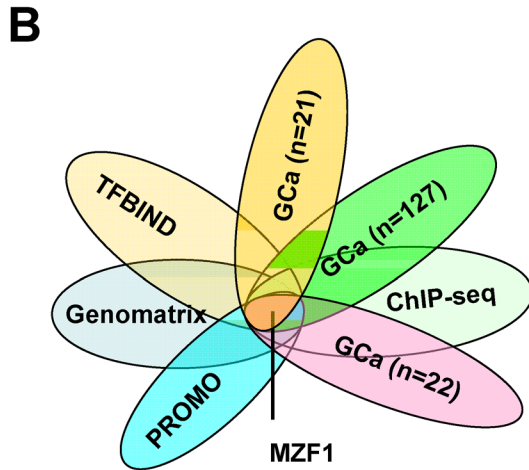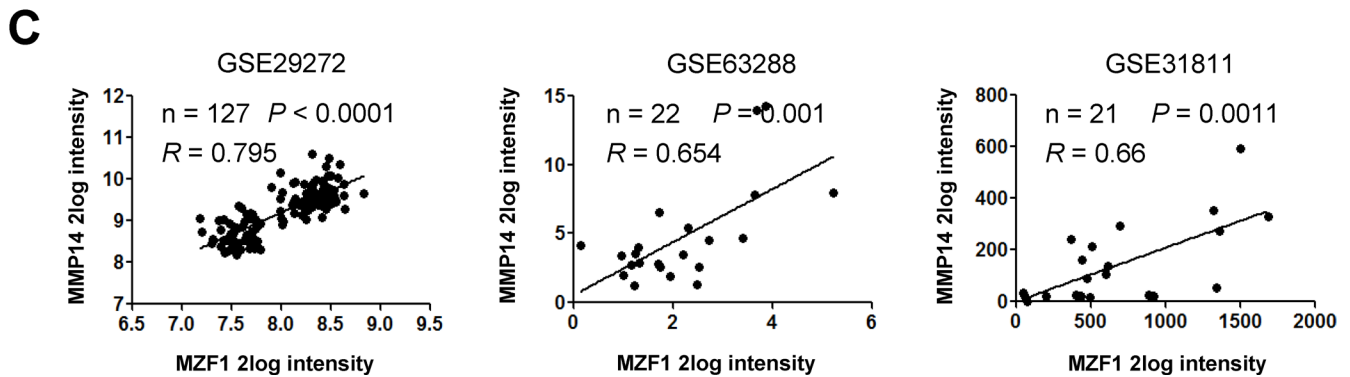

**Supplementary Figure S1: Determining the transcription factor crucial for MMP-14 expression.** (A), dual-luciferase assay showing the activity of different *MMP-14* promoter fragments in gastric cancer cells. (B), over-lapping analysis revealing MZF1 as a crucial transcription factor binding to the *MMP-14* promoter region (chr14:23305444-23305733). (C), the correlation between MZF1 and MMP-14 levels in gastric cancer cohorts derived from Gene Expression Omnibus (GEO) datasets. \* $P < 0.01$  vs. pGL3-MMP-14 (-1246/+199).

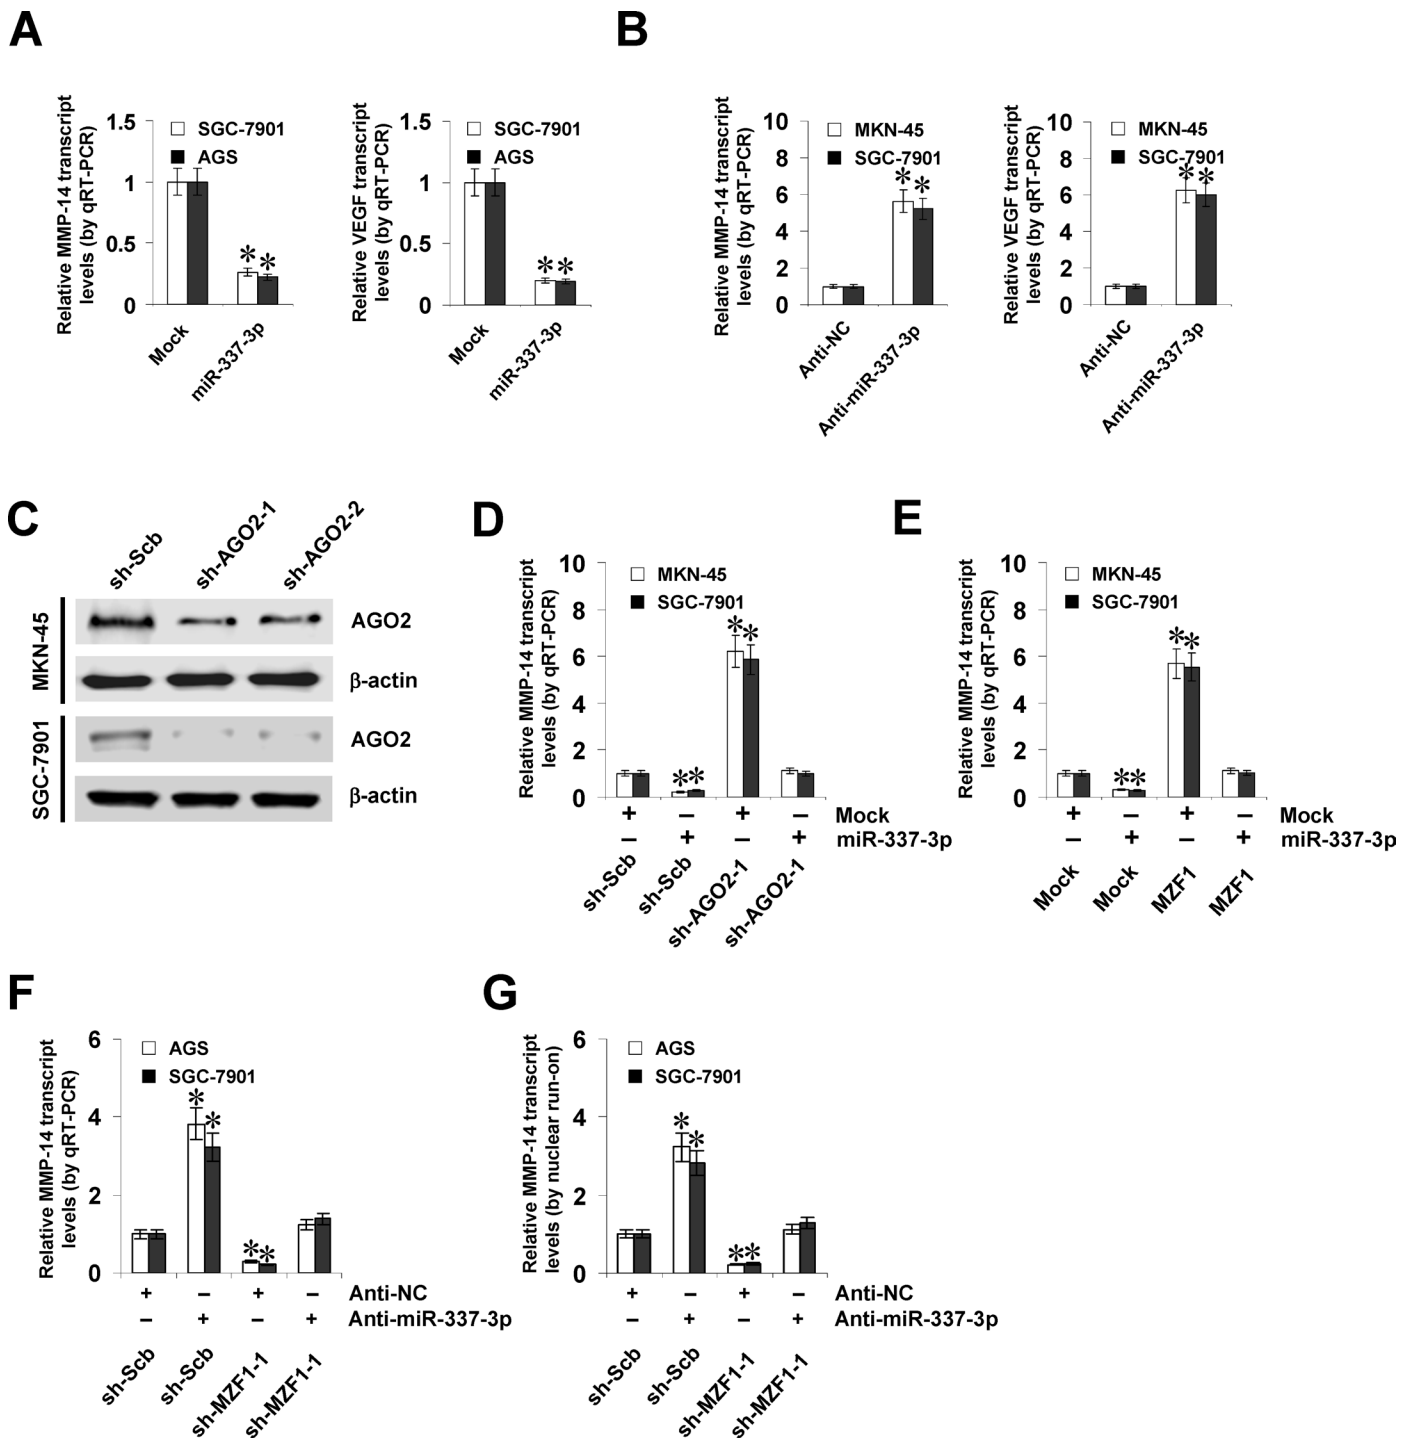

**Supplementary Figure S2: Expression of MMP-14 and VEGF in gastric cancer cells.** (A and B), real-time quantitative RT-PCR showing the transcript levels of *MMP-14* and *VEGF* in gastric cancer cells transfected with empty vector (mock), miR-337-3p precursor, anti-NC (100 nmol/L), or anti-miR-337-3p inhibitor (100 nmol/L). (C), western blot indicating the AGO2 expression in gastric cancer cells transfected with scramble shRNA (sh-Scb) or AGO2 shRNA (sh-AGO2). (D and E), real-time quantitative RT-PCR showing the transcript levels of *MMP-14* in gastric cancer cells stably transfected with mock or miR-337-3p precursor, and those co-transfected with sh-Scb, sh-AGO2, mock, or MZF1. (F and G), real-time quantitative RT-PCR and nuclear run-on assays indicating the transcript levels and nascent transcription of *MMP-14* in gastric cancer cells transfected with anti-NC (100 nmol/L) or anti-miR-337-3p inhibitor (100 nmol/L), and co-transfected with sh-Scb or sh-MZF1. \* $P < 0.01$  vs. mock, anti-NC, mock+sh-Scb, or anti-NC+sh-Scb.

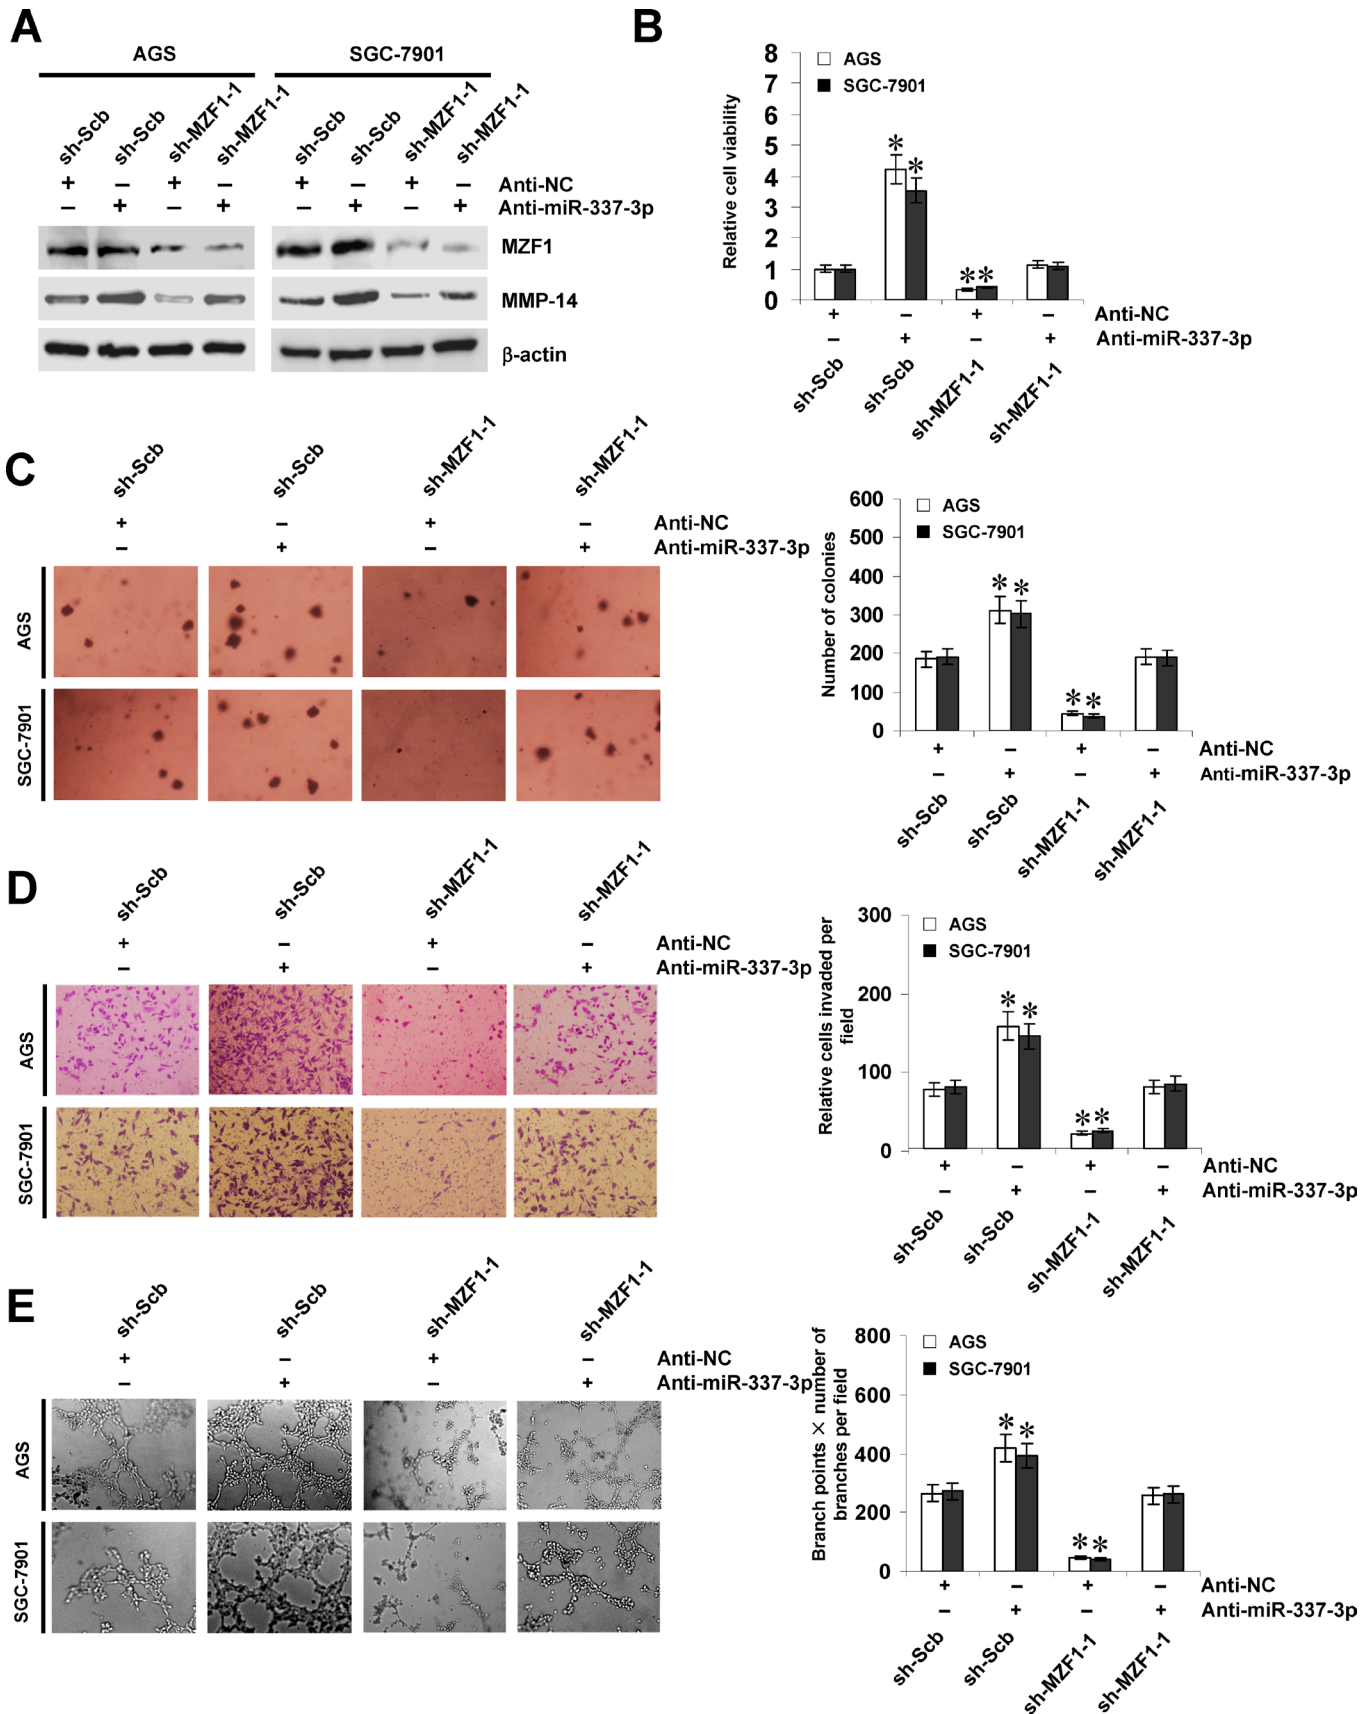

**Supplementary Figure S3: Effects of miR-337-3p and MZF1 on the growth, invasion, and angiogenesis of gastric cancer cells.** Gastric cancer cells were transfected with anti-NC (100 nmol/L) or anti-miR-337-3p inhibitor (100 nmol/L), and co-transfected with sh-Scb or sh-MZF1. Western blot assay (A) showing the expression of MZF1 and MMP-14. MTT colorimetric (B), soft agar (C), matrigel invasion (D), tube formation (E) assays indicating the cellular viability, growth, invasion, angiogenesis capability, respectively. \* $P < 0.01$  vs. anti-NC+sh-Scb.



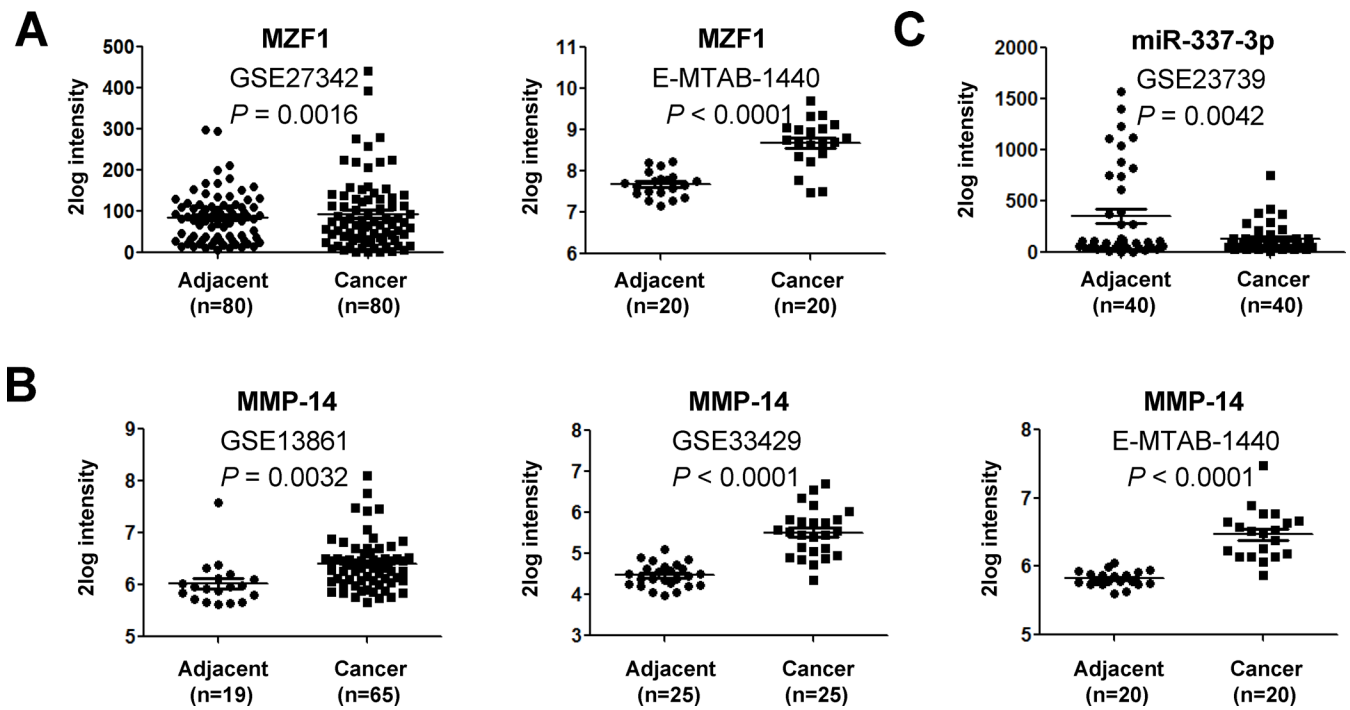

**Supplementary Figure S4: Expression of MZF1, MMP-14, and miR-337-3p in public databases.** (A, B, and C), the MZF1, MMP-14, and miR-337-3p expression in gastric cancer and adjacent normal tissues derived from Gene Expression Omnibus (GEO) and ArrayExpress (<http://www.ebi.ac.uk/arrayexpress>) datasets.
